# Supplementary material for: Evaluation of Rye Bran Enzymatic Hydrolysate Effect on Gene Expression and Bacteriocinogenic Activity of Lactic Acid Bacteria
Source: MDPI journal article supplement (doi:10.3390/fermentation8120752), 2022-12-17
Supplement: s1 [file s1]

**Table S1.** Screening of lactic acid bacteria strains for known and predicted bacteriocin genes.

| Species                                                   | Strains             | Gene                                 |
|-----------------------------------------------------------|---------------------|--------------------------------------|
| <b><i>Lactobacillus acidophilus</i></b>                   | <b>VKPM B-2105</b>  | <b><i>hlyJ</i></b>                   |
| <i>Lactobacillus acidophilus</i>                          | VKPM B-2900         | <i>hlyJ</i>                          |
| <i>Lactobacillus acidophilus</i>                          | VKPM B-6551         | <i>hlyJ</i>                          |
| <i>Lactobacillus acidophilus</i>                          | VKPM B-6552         | <i>hlyJ</i>                          |
| <i>Lactobacillus buchneri</i>                             | VKPM B-7641         | <i>gasT</i>                          |
| <i>Lactobacillus delbrueckii</i> subsp. <i>bulgaricus</i> | VKPM B-11948        | nd                                   |
| <i>Lactobacillus casei</i>                                | VKPM B-2872         | nd                                   |
| <i>Lactobacillus casei</i>                                | VKPM B-2873         | nd                                   |
| <i>Lactobacillus fermentum</i>                            | VKPM B-8724         | <i>hlyJ</i>                          |
| <i>Lactobacillus gallinarum</i>                           | VKPM B-10907        | LCA12A_2788                          |
| <i>Lactobacillus graminis</i>                             | VKPM B-11233        | <i>BacSJ2-8</i> , LG542_08235        |
| <i>Lactobacillus paracasei</i>                            | VKPM B-4079         | LCA12A_2788                          |
| <b><i>Lactobacillus paracasei</i></b>                     | <b>VKPM B-11657</b> | <b>LCA12A_2788</b>                   |
| <b><i>Lactobacillus plantarum</i></b>                     | <b>VKPM B-11007</b> | <b><i>plnA, plnE, plnF, plnJ</i></b> |
| <i>Lactobacillus reuteri</i>                              | VKPM B-9448         | nd                                   |
| <i>Lactobacillus rhamnosus</i>                            | VKPM B-8238         | LRHK_2402                            |
| <i>Lactobacillus sakei</i>                                | VKPM B-8936         | nd                                   |
| <b><i>Lactobacillus salivarius</i></b>                    | <b>VKPM B-2214</b>  | <b>LCA12A_2788</b>                   |

The LAB strains were tested for the presence of genes encoding known *Lactobacillus* bacteriocins (*acdT*, *acdB*, *bacSJ2-8*, *gasT*, *hlyJ*, *hly*, *papA*, *plnA*, *plnE*, *plnF*, *plnJ*, *plnK*, *sakA*, *sakQ*, *abp118α*) and predicted bacteriocins lactococcin 972 family (LacC0470\_08940 and LG542\_08235) and class II b bacteriocins (LRHK\_2402 and LCA12A\_2788), as well as lantibiotic-related genes *lanB*, *lanC* (class I type I lantibiotics) and *lanM* (class I type II lantibiotics). N/d means not detected.
